1 **Title: Motor skill learning decreases motor variability and increases planning horizon**

2

3 **Authors**

4 Luke Bashford<sup>1,2,3,+,\*</sup>, Dmitry Kobak<sup>1,2,3,4++,\*</sup>, Jörn Diedrichsen<sup>5</sup>, Carsten Mehring<sup>1,2,3</sup>

5

6 <sup>1</sup>Bernstein Center Freiburg, University of Freiburg, Freiburg, Germany

7 <sup>2</sup>Faculty of Biology, University of Freiburg, Freiburg, Germany

8 <sup>3</sup>Imperial College London, London, UK

9 <sup>4</sup>Champalimaud Centre for the Unknown, Lisbon, Portugal

10 <sup>5</sup>Brain and Mind Institute & Department for Computer Science, University of Western Ontario,

11 Ontario, Canada

12 <sup>+</sup>Now at: Caltech, Pasadena, CA, USA

13 <sup>++</sup>Now at: Institute for Ophthalmic Research, Tübingen University, Tübingen, Germany

14 <sup>\*</sup>Equal contribution

15

16 **Corresponding author**

17 Luke Bashford, bashford@caltech.edu

18 **Abstract**

19

20 We investigated motor skill learning using a path tracking task, where human subjects had to  
21 track various curved paths at a constant speed while maintaining the cursor within the path  
22 width. Subjects' accuracy increased with practice, even when tracking novel untrained paths.  
23 Using a “searchlight” paradigm, where only a short segment of the path ahead of the cursor  
24 was shown, we found that subjects with a higher tracking skill differed from the novice subjects  
25 in two respects. First, they had lower motor variability, in agreement with previous findings.  
26 Second, they took a longer section of the future path into account when performing the task,  
27 i.e. had a longer planning horizon. We estimate that between one third and one half of the  
28 performance increase was due to the increase in planning horizon. An optimal control model  
29 with a fixed horizon (receding horizon control) that increases with tracking skill quantitatively  
30 captured the subjects' movement behaviour. These findings demonstrate that human subjects  
31 not only increase their motor acuity but also their planning horizon when acquiring a motor  
32 skill.

33 **New and Noteworthy**

34 We show that when learning a motor skill humans are using information about the  
35 environment from an increasingly longer amount of the movement path ahead to improve  
36 performance. Crucial features of the behavioural performance can be captured by modelling  
37 the behavioural data with a receding horizon optimal control model.

## 38 **Introduction**

39

40 The human motor system can acquire a remarkable array of motor skills. Informally, a person  
41 is said to be “skilled” if he or she can perform faster and at the same time more accurate  
42 movements than other, unskilled, individuals. What we don't know, however, is what learning  
43 processes and components underlie our ability to move better and faster. One component may  
44 be relatively “cognitive”, involving the faster and more appropriate selection and planning of  
45 upcoming actions (Diedrichsen and Kornysheva 2015; Wong et al. 2015). Another component  
46 may be related to motor execution – the ability to produce and fine control difficult  
47 combinations of muscle activations (Shmuelof et al. 2012; Waters-Metenier et al. 2014).  
48 Depending on the structure of the task, changes in visuo-motor processing or feedback control  
49 may also contribute to skill development. Motor adaptation extensively studied using  
50 visuomotor and force perturbations (Shadmehr et al. 2010), may play a certain role in  
51 stabilizing performance, but it cannot by itself lead to improvements in the speed-accuracy  
52 trade-off (Wolpert et al. 2011).

53

54 A task commonly used in the experiments on motor skill learning is sequential finger tapping,  
55 where subjects are asked to repeat a certain tapping sequence as fast and as accurately as  
56 possible (Karni et al. 1995, 1998; Petersen et al. 1998; Walker et al. 2002). Improvement in  
57 such a task can continue over days, but previous papers have focussed mostly on the learning  
58 that is specific to the trained sequence(s) (Karni et al. 1995).

59

60 Many real-world tasks, however, do not involve the production of a fixed sequence of motor  
61 commands, but the flexible planning and execution of movements. Such flexibility is often well  
62 described by optimal feedback control models (Braun et al. 2009; Diedrichsen et al. 2010;

63 Todorov and Jordan 2002) where the skilled actor appears to compute “on the fly” the most  
64 appropriate motor command for the task at hand. This requires demanding computations  
65 (Todorov and Jordan 2002), and the human motor system likely has found heuristics to deal  
66 with this complexity. One way to reduce complexity of the control problem is to not optimize  
67 the whole sequence of motor commands that will achieve the ultimate goal, but to only optimise  
68 the current motor command for a short distance into the future. This idea is called receding  
69 horizon control, also known as model predictive control (Kwon and Han 2005). Under this  
70 control regime, the system computes a feedback control policy that is optimal for a finite  
71 planning horizon. The control policy is then continuously updated as the movement goes on  
72 and the planning horizon is being shifted forward. This allows for adaptability, e.g. it can  
73 flexibly react to perturbations or unexpected challenges, as sensory information becomes  
74 available. Recent studies provided indirect evidence that favour the optimisation of short time-  
75 periods of a motor command (Dimitriou et al. 2013). The notion of planning horizon also arises  
76 in reinforcement learning, e.g. in the context of the so-called successor representation  
77 (Momennejad et al. 2017).

78

79 Motivated by these ideas, we propose that some of the skill of a down-hill skier or a race-car  
80 driver may lie not only in the increased ability to execute difficult motor commands (e.g. due  
81 to decreased motor variability), but also in the ability to plan further ahead and to optimize the  
82 movements for a longer time period into the future. In addition, we propose that the time span  
83 that subjects plan ahead increases with experience, leading to an increasing performance with  
84 training.

85

86 To test this idea, we designed an experimental condition which would allow us to measure the  
87 planning horizon that skilled actors are using when executing long sequence of movements that

88 need to be planned “on the fly” – i.e. where the actual sequence of movements cannot be  
89 memorized. For this, we developed a path tracking task, where subjects had to maintain their  
90 cursor within a path that was moving towards them at a fixed speed. A similar task has been  
91 previously used in motor control research (Poulton 1974), using a mechanical apparatus with  
92 paths drawn on a paper roll that was moving at a fixed speed. It has been shown that subjects  
93 are able to increase their accuracy with training, but the different computational strategies  
94 between expert subjects and naïve performers remain unclear. In our study we use ‘searchlight’  
95 trials in which subjects see various lengths of the approaching path ahead of their cursor to  
96 probe subjects forward planning and compare experts and novices in this respect.

97

## 98 **Materials and Methods**

### 99 **Subjects**

100 62 experimentally naïve subjects took part in this experiment (33 males and 29 females, age  
101 range 20-52 years old). Subjects gave written informed consent and were paid 10 €/h. The  
102 experimental procedures received ethics approval from the University of Freiburg.

103

### 104 **Setup**

105 Subjects sat at a desk looking at a computer monitor (Samsung Syncmaster 226BW) located  
106 ~80cm away. A cursor displayed on the screen (Matlab and Psychophysics Toolbox Version 3  
107 (Brainard 1997)) was under position control by movements of a computer mouse. The mouse  
108 could be moved on the desk in all directions but only the horizontal (left and right) component  
109 contributed to the cursor movement: the vertical position of the cursor was fixed at 5.7mm  
110 above the base of the screen.

111

### 112 **Task**

113 To begin each trial subjects had to press the space bar. This displayed the cursor ( $R=2.9\text{mm}$ ,  
114  $1.1\text{cm}$  from the bottom of the screen) and the path (width =  $2.83\text{cm}$ ) that extended from the top  
115 to bottom of the screen ( $30\text{cm}$ ). The path continuously moved downward on the screen at a  
116 vertical speed of  $34.1\text{cm/s}$ . The initially visible path was a straight line centered in the middle  
117 of the screen with the cursor positioned in the middle of the path. Once this initial section  
118 moved through the screen, the path then followed a random curvature (Fig. 1A). Subjects were  
119 instructed to keep the cursor between the path borders at all times moving only in the horizontal  
120 plane and were told to be as accurate as possible. The cursor and path were displayed in white

121 if the cursor was within the path and both turned red when it was outside the path, always on a  
122 black background.

123

124 The cursor position was sampled at 60 Hz and the tracking accuracy was defined for each trial  
125 as the percentage of time steps when the cursor was inside the path. Running accuracy values  
126 were continuously displayed in the top left corner of the screen and final accuracies were  
127 displayed between the trials.

128

129 This experiment is based on a previous version where subjects were asked to track static  
130 randomly curved paths in 2D as quickly as possible without touching the sides [unpublished  
131 data, (Bashford et al. 2014)]. We later found that the 1D paradigm presented here was better  
132 suited to study the planning horizon as the speed was fixed.

### 133 **Paradigm**

134 Subjects were randomly assigned into two groups: expert (N=32) and naive (N=30). The  
135 paradigm included a training (expert group only) and a testing (all subjects) phase. Subjects in  
136 the expert group trained over 5 consecutive days, each day completing 30 minutes of path  
137 tracking (10 of 3-minute trials with short breaks in-between, searchlight length (s) 100%). If  
138 the performance improved from one trial to the next subjects saw a message saying  
139 “Congratulations! You got better! Keep it up!”, otherwise the message “You were worse this  
140 time! Try to beat your score!” was shown. The training paths were randomly generated on the  
141 fly. Experts performed the testing set of trials after a short break following training on the final  
142 (5th) day. Naïve subjects performed only the testing set of trials.

143

144 The testing phase lasted 30 min (30 of 1-minute trials with breaks in-between) using 30  
145 different pre-generated paths that were the same for all subjects. The testing phase in this



146 experiment contained 3 normal trials (s=100%) and 27 searchlight trials (s=10-90%) where  
147 some upper part of the path was not visible. Three blocks of 10 trials with the searchlight length  
148 ranging from s=10% to s=100% (in steps of 10%) were presented, with the order shuffled in  
149 each block; the same fixed pseudorandom sequence was used for all subjects.

150

### 151 **Path generation**

152 Paths were generated before each trial start during training and a pre-generated fixed set was  
153 produced in the same way for testing. Each path was initialized to start at the bottom middle of  
154 the screen and the initial 30 cm of each path were following a straight vertical line. Subsequent  
155 points of the path midline had a fixed Y step of 40 pixels (1.1 cm) and random independent  
156 and identically distributed (iid) X steps drawn from a uniform distribution from 1 to 80 pixels  
157 (2.7mm – 2.2cm). Any step that would cause the path to go beyond the right or left screen  
158 edges was recalculated. The midline was then smoothed with a Savitzky-Golay filter (12th  
159 order, window size 41) and used to display path boundaries throughout the trial. All of the  
160 above parameters were determined in pilot experiments to create paths which were very hard  
161 but not impossible to complete after training.

162

### 163 **Statistical analysis**

164 In all cases, we used nonparametric rank-based statistical tests to avoid relying on the normality  
165 assumption. In particular, we used Spearman's correlation coefficient instead of the Pearson's  
166 coefficient, Wilcoxon signed-rank test instead of paired two-sample t-test, and Wilcoxon-  
167 Mann-Whitney ranksum test instead of unpaired two-sample t-test.

168

169 We initially recorded N=10 subjects in each group and observed statistically significant  
170 ( $p < 0.05$ ) effect that we are reporting here: positive correlation between the asymptote  
171 performance and the horizon length, as estimated via the changepoint and exponential models.  
172 We then recorded another N=20/22 (naïve/expert) subjects per group to confirm this finding.  
173 This internal replication confirmed the effect ( $p < 0.05$ ). The final analysis reported in this study  
174 was based on all N=62 subjects together. A preliminary version of the analysis for the initial  
175 N=10/10 subjects can be found in our preprint (Bashford et al. 2014), but note that it used a  
176 different way to estimate planning horizon compared to the procedure presented here, and so  
177 the values are not directly comparable.

178

### 179 **Changepoint and Exponential model**

180 We used two alternative models to describe the relationship between the searchlight length and  
181 the accuracy: a linear changepoint model and an exponential model. We used two different  
182 models to increase the robustness of our analysis and both models support our conclusions.

183

184 The changepoint model is defined by

$$185 \quad y = \begin{cases} cs + o & \text{if } s \leq h_{cp} \\ ch_{cp} + o & \text{if } s > h_{cp} \end{cases}$$

186 where  $y$  is the subject's performance,  $s$  the searchlight length and  $(c, o, h_{cp})$  are the subject-  
187 specific parameters of the model which define the baseline performance at searchlight 0% ( $o$ ),  
188 the amount of increase of performance with increasing searchlight ( $c$ ) and the planning horizon  
189 ( $h_{cp}$ ) after which the performance does not increase any further.

190

191 The exponential model is defined by

$$192 \quad y = \psi - \exp(-\rho s + d)$$

193 where the subject-specific parameters ( $\psi$ ,  $d$ ,  $\rho$ ) specify the performance at searchlight 0% ( $\psi -$   
194  $\exp[d]$ ), the asymptote for large searchlights ( $\psi$ ) and the speed of performance increase ( $\rho$ ).  
195 This function monotonically increases but it never plateaus. The speed of the increase depends  
196 on the parameter  $\rho$  with larger values meaning faster approaching the asymptote. We used the  
197 following quantity as a proxy for the “effective” planning horizon:  $10 + \log(5)/\rho$ . It can be  
198 understood as the searchlight length that leads to performance being five times closer to the  
199 asymptote than at  $s=10\%$ . The  $\log(5)$  factor was chosen to yield horizon values of roughly the  
200 same scale as with the changepoint model above.

201

202

203 Both models (changepoint and exponential) were fit to the raw performance data of each  
204 subject, i.e. to the 30 data points, 3 for each of the 10 searchlight length values. The exponential  
205 fit (see Equation 2 in the Results) was done with the Matlab's `nlinfit()` function, implementing  
206 Levenberg-Marquardt nonlinear least squares algorithm. The changepoint fit (see Equation 1  
207 in the Results) was done with a custom script that worked as follows. It tried all values of  $h_{cp}$   
208 on a grid that included  $s=10\%$  and then went from  $s=20\%$  to  $s=100\%$  in 100 regular steps. For  
209 each value of  $h_{cp}$  the other two parameters can be found via linear regression after replacing all  
210  $s > h_{cp}$  values with  $h_{cp}$ . We then chose  $h_{cp}$  that led to the smallest squared error.

211

## 212 **Trajectory analysis**

213 To shed light on the learning process we analysed additional parameters of the subjects’  
214 movement trajectories.

215 First, we computed the time lag between the subjects’ movement trajectories and the midline  
216 of the paths (Figure 4A-B). To compute the lags, we interpolated both cursor trajectories and

217 path midlines 10-fold (to increase the resolution of our lag estimates). We computed the  
218 Pearson correlation coefficient between cursor trajectory and path midline for time shifts from  
219 of -300 to 300 ms, and defined the time lag as the time shift maximizing the correlation. Second,  
220 we extracted the cursor trajectories in all sections across all paths that shared a similar curved  
221 shape to explore the differences in cursor position at the apex of the curve (Figure 4C). The  
222 segments were selected automatically by sliding a window of length 18 cm across the path. We  
223 included all segments that were lying entirely to one side (left or right) of the point in the middle  
224 of the sliding window ("C-shaped" segments), with the upper part and the lower part both going  
225 at least 4.5 cm away in the lateral direction (see Figure 3). Our results were not sensitive to  
226 modifying the exact inclusion criteria.

227 To draw the 75% coverage areas of the path inflection points in each group (Figure 4C), we  
228 first performed a kernel density estimate of these points using the Matlab function `kde2d()`,  
229 which implements an adaptive algorithm suggested in (Botev et al. 2010). After obtaining the  
230 2d probability density function  $p(x)$ , we found the largest  $h$  such that  $\int p(x)dx > 0.75$  over the  
231 area where  $p(x) > h$ . We then used Matlab's `contour()` function to draw contour lines of height  $h$   
232 in the  $p(x)$  function.

233

### 234 **Receding horizon model**

235 We modelled subjects' behaviour by a stochastic receding horizon model in discrete time  $t$ . In  
236 receding horizon control (RHC, (Kwon and Han 2005)) motor commands  $u_t$  are computed to  
237 minimize a cost function  $L_t$  over a finite time horizon of length  $h$ :

$$238 \quad \text{minimize } L_t(\{x_t\}, \{u_t\}) \quad (1)$$

$$239 \quad \text{subject to } L_t = \sum_{k=1}^h l_{t+k}$$

$$240 \quad x_{t+1} = f(x_t, u_t)$$

241 where  $f$  defines the dynamics of the controlled system. Equation (1) is equivalent to an optimal  
242 control problem over the fixed future interval  $[t + 1, t + h]$ . Solving (1) yields a sequence of  
243 optimal motor commands  $\{u_0^{opt}, u_1^{opt}, \dots, u_{h-1}^{opt}\}$ . The control applied at time  $t$  is the first  
244 element of this sequence, i.e.  $u_t = u_0^{opt}$ . Then, the new state of the system  $x_{t+1}$  is measured  
245 (or estimated) and the above optimization procedure is repeated, this time over the future  
246 interval  $[t + 2, t + 1 + h]$ , starting from the state  $x_{t+1}$ .

247

248 Applying RHC to our experimental task, the dynamics of the cursor movement was modelled  
249 by a linear first-order difference equation:

$$250 \quad x_{t+1} = x_t + u_{t-\tau} + \eta_t \quad \eta_t \in \mathcal{N}(0, \sigma^2) \quad (2)$$

251 where  $t$  is the time step,  $x_t$  the cursor position at time  $t$ ,  $u_t$  is the motor command applied at  
252 time  $t$  and  $\tau$  the motor delay.  $\eta_t$  is the motor noise which was modelled as additive Gaussian  
253 white noise with zero mean and variance  $\sigma^2$ . We used the following cost function

$$254 \quad L_t = \sum_{k=\tau+1}^h [-\log(q_{t+k}) + \lambda |u_{t-\tau+k-1}|^2] \quad (3)$$

255 where  $L_t$  is the expected cost at time  $t$ ,  $q_{t+k}$  is the probability of the cursor being inside the path  
256 at time  $t+k$ ,  $h$  is the length of the horizon in time and  $\lambda$  is the weight of the motor command  
257 penalty. At every time step  $t$ ,  $L_t$  is minimized to compute  $u_t$  while  $\{u_0, \dots, u_{t-1}\}$  are known.  
258 Consequently, the lower bound of the sum in (3) is  $\tau + 1$ . The cost function in (3) reflects a  
259 trade-off between accuracy (first term, i.e.  $\log[q_{t+k}]$ ) and effort (second term) whereas their  
260 relative importance is controlled by  $\lambda$ . Cost functions with a similar accuracy-effort trade-off  
261 have been used previously to successfully model human motor behaviour (Braun et al. 2009;  
262 Diedrichsen 2007; Todorov and Jordan 2002).

263 We assume that subjects have acquired a forward model of the control problem and they can,  
 264 therefore, predict the cursor position at time  $t+1$  from the cursor position at time  $t$  and the motor  
 265 command in accordance with equation (2). We also assume that subjects have an accurate  
 266 estimate of the position of the cursor at time  $t$ , i.e.  $x_t$  is known. Subjects can then compute the  
 267 probability distribution of the cursor position at future times  $t+k$ , given by:

$$268 \quad p(x_{t+k}|x_t, \{u_{t-\tau}, u_{t-\tau+1}, \dots, u_{t-\tau+k-1}\}) = \frac{1}{\sqrt{2\pi k\sigma^2}} e^{-\frac{(\hat{x}_{t+k})^2}{2k\sigma^2}} \quad (5)$$

269 with

$$270 \quad \hat{x}_{t+i} = x_t + \sum_{l=1}^i u_{t-\tau+l-1} \quad (6)$$

271 The probability of the cursor being inside the path is then given by

$$272 \quad q_{t+k} = \int_{m_{t+k}-\frac{w}{2}}^{m_{t+k}+\frac{w}{2}} \frac{1}{\sqrt{2\pi k\sigma^2}} e^{-\frac{(\hat{x}_{t+k}-z)^2}{2k\sigma^2}} dz \quad (7)$$

273 where  $m_t$  is the position of the midline of the path at time  $t$  and  $w$  the width of the path. The  
 274 receding horizon model assumes that motor commands  $u_t$  are computed by minimizing the  
 275 cost  $L_t$  in each time step  $t$  for a fixed and known set of model parameters  $(h, \lambda, \tau, \sigma^2)$ . We  
 276 simplify the optimisation problem by approximating  $q_{t+k}$  by

$$277 \quad q_{t+k} \approx w \frac{1}{\sqrt{2\pi k\sigma^2}} e^{-\frac{(\hat{x}_{t+k}-m_{t+k})^2}{2k\sigma^2}} \quad (8)$$

278 The higher  $k\sigma_k^2$  is relative to the path width  $w$ , the higher the accuracy of this approximation.  
 279 Note that the squared error is scaled by  $k\sigma^2$  and hence, errors in the future are discounted. This  
 280 is a consequence of the used model of the cursor dynamics in (equation 2).

281 Using equation (8) and removing all terms which do not depend on  $u_t$ , we can derive a  
 282 simplified cost function

$$283 \quad \tilde{L}_t = \sum_{k=\tau+1}^h \left[ \frac{(\hat{x}_{t+k} - m_{t+k})^2}{2k\sigma^2} + \lambda |u_{t-\tau+k-1}|^2 \right] \quad (9)$$

284 Equation (9) shows that the trade-off between accuracy and the magnitude of the motor  
 285 commands is controlled by  $\sigma^2\lambda$ . We therefore can eliminate one parameter and use the  
 286 equivalent cost function

$$287 \quad \tilde{L}_t = \sum_{k=\tau+1}^h \left[ \frac{(\hat{x}_{t+k} - m_{t+k})^2}{2k} + \tilde{\lambda} |u_{t-\tau+k-1}|^2 \right] \text{ with } \tilde{\lambda} = \sigma^2\lambda \quad (10)$$

288 The gradient of the cost function  $\tilde{L}_t$  is given by

$$289 \quad \frac{\partial \tilde{L}_t}{\partial u_{t+j}} = 2\tilde{\lambda}u_{t+j} + \sum_{k=j+(\tau+1)}^h \left[ \frac{(\hat{x}_{t+k} - m_{t+k})}{k} \right] \quad (11)$$

290 with  $j = 0, \dots, h - (\tau + 1)$ . The Hessian of the cost function is given by

$$291 \quad \frac{\partial^2 \tilde{L}_t}{\partial u_{t+m} \partial u_{t+n}} = 2\delta_{m,n}\tilde{\lambda} + \sum_{k=\max(m,n)+(\tau+1)}^h \frac{1}{k} \quad (12)$$

292 with  $m, n = 0, \dots, h - (\tau + 1)$ . For  $\tilde{\lambda} = 0$  all pivots of the Hessian matrix are positive and  
 293 therefore the Hessian is positive definite for  $\tilde{\lambda} = 0$ . For the general case  $\tilde{\lambda} > 0$  the Hessian  
 294 remains positive definite as  $H_2 = H_1 + D$  is positive definite if  $H_1$  is positive definite and  $D$  is  
 295 a diagonal matrix with only positive diagonal entries. Given the positive definiteness of the  
 296 Hessian we can conclude that the cost function  $\tilde{L}_t$  is strictly convex with a unique global  
 297 minimum. Setting the gradient (12) to  $\mathbf{0}$  defines a system of  $h-\tau$  linear equations with  $h-\tau$   
 298 unknowns  $(u_t, \dots, u_{t+h-(\tau+1)})$  which solution minimizes  $\tilde{L}_t$ . The solution can be computed  
 299 efficiently using standard numerical techniques. We used the ‘linsolve’ function of MATLAB  
 300 (R2016b) which uses LU factorization.

301 As a measure of task performance, we computed the expected time inside the path from the  
 302 model trajectory  $z_t$  as follows

$$303 \quad a = \frac{1}{T} \sum_{t=1}^T \left[ 1 - \int_{m_{t-\frac{w}{2}}}^{m_{t+\frac{w}{2}}} \frac{1}{\sqrt{2\pi\sigma^2}} e^{-\frac{(z_t-\eta)^2}{2\sigma^2}} d\eta \right] \quad (13)$$

304 with  $T$  depicting the number of time steps per path. The lag was computed by maximizing the  
305 correlation coefficient between the model trajectories and the path midline identical to how the  
306 lag was computed for the subjects' trajectories.

307 When applying the model to the searchlight path we made the additional assumption that the  
308 model horizon increases with searchlight length  $s$  up to a maximal value  $h_{max}$  beyond which  
309 the model horizon remains constant:

$$311 \quad h(s) = \begin{cases} s, & s < h_{max} \\ h_{max}, & s \geq h_{max} \end{cases} \quad (14)$$

310

### 312 **Fitting the receding horizon model to subjects' behaviour**

313 We fitted the RHC model to the subjects' movement trajectories in the searchlight testing paths  
314 using Bayesian inference (Gelman et al. 2003). The model parameters were estimated by  
315 computing their expected values from the posterior distribution

$$316 \quad \hat{\beta} = \langle \beta \rangle = \int \beta p(\beta|v) d\beta \quad (15)$$

317 where  $\beta$  is the model parameter,  $v$  the movement trajectory data of a subject and  $p(\beta|v)$  the  
318 posterior probability distribution for  $\beta$ . We approximated the integral in (15) by sampling from  
319 the posterior distribution using the Metropolis algorithm which can sample from a target  
320 distribution that can be computed up to a normalizing constant (Gelman et al. 2003). The RHC  
321 model has four parameters  $(h_{max}, \tau, \tilde{\lambda}, \sigma^2)$  out of which three  $(h_{max}, \tau, \tilde{\lambda})$  affect the shape of  
322 the trajectory (cf. equation (10)). Assuming a flat prior for the model parameters, i.e.  $p(h_{max}, \tau, \tilde{\lambda}) = \text{const.}$ , and a non-informative prior for the error-variance  $\delta^2$ , i.e.  $p(\delta^2) = 1/\delta^2$   
323 (Gelman et al. 2003), we obtained the following equation for the posterior

$$325 \quad p(\beta|w) \propto p(h_{max}, \tau, \tilde{\lambda}) \frac{1}{\delta^{2+N}} e^{-\frac{\text{mse}(h_{max}, \tau, \tilde{\lambda})}{2\delta^2}} \quad (16)$$



326 where  $mse(h_{max}, \tau, \tilde{\lambda})$  is the mean squared error between the model and the subject movement  
 327 trajectories and  $N$  the number of trials. The mean squared error between the movement  
 328 trajectories of a subject and the model is given by

$$329 \quad mse(h_{max}, \tau, \tilde{\lambda}) = \frac{1}{10T|\mathcal{F}|} \sum_{s=1}^{10} \sum_{j \in \mathcal{F}_s} \sum_{t=1}^T \left( v_t^{(s,j)} - z_t^{(s,j)}(h_{max}, \tau, \tilde{\lambda}) \right)^2 \quad (17)$$

330 with  $T$  depicting the number of time steps per path,  $\mathcal{F}_s$  the set of paths ids for searchlight  $s$ ,  
 331  $v_t^{(s,j)}$  the movement of subject  $i$  at time  $t$  in path  $j$  for searchlight  $s$  and  $z_t^{(s,j)}(h_{max}, \tau, \tilde{\lambda})$  the  
 332 corresponding movement predicted by the RHC model.

333 To save computation time, we precomputed the  $mse$  for specific discrete combinations of the  
 334 model parameters. The model horizon parameter  $h_{max}$  could take any integer value between 1  
 335 and 26 given a maximum possible planning horizon of 30cm (vertical screen size) which is  
 336 equivalent to  $30\text{cm} / \left( 34 \frac{\text{cm}}{\text{s}} \cdot \frac{1}{30} \text{s} \right) = 30\text{cm} / \left( \frac{34}{30} \text{cm} \right) \approx 26$  time steps, where 34 cm/s is the  
 337 path speed and 1/30s the time step. Hence, admissible values for the horizon parameter  
 338 corresponded to horizons of  $h_{max} = (1, \dots, 26) * \frac{34}{30} \text{cm}$ . For the delay we allowed the values  
 339  $\tau = (1, \dots, 15) * \frac{1}{30} \text{s}$ , assuming that subjects won't have larger delays than 500ms. In fact, the  
 340 maximum delay of a subject we found from fitting was 286 ms which is well below the limit  
 341 we imposed. The motor penalty parameter  $\tilde{\lambda}$  was allowed to take any of  $10^3$  logarithmically  
 342 equally spaced values between  $10^{-4}$  and  $10^7$  and 0. In total, we had, therefore,  
 343  $26 \times 15 \times 1001 = 390390$  admissible parameter combinations for  $h_{max}, \tau$  and  $\tilde{\lambda}$ . We simulated the  
 344 model for all of these parameter values and computed the mean squared errors according to  
 345 equation (17). We then used the Metropolis algorithm to generate  $10^6$  samples from the  
 346 posterior distribution of the parameters. Each sample consisted of a 4-tuple of values for the  
 347 parameters  $(h_{max}, \tau, \tilde{\lambda}, \delta^2)$ . We computed the motor noise parameter of the model  $\sigma^2$  from the

348 estimated error-variance  $\delta^2$  as explained below and then  $\lambda = \tilde{\lambda}/\sigma^2$  (cf. equation 10). For each  
349 parameter sample we also computed the lag, as explained at the end of the previous section,  
350 and the task performance using equation (13). As a result, we obtained  $10^6$  parameter values,  
351 lags and task performances, which reflect samples from the posterior distribution of the model  
352 parameters.

353 To evaluate the quality of the model, we used three-fold cross-validation where in each fold  
354 the posterior distributions of the model parameters were estimated using the data from two of  
355 the three trials for each searchlight. The posterior distributions were then used to make model  
356 predictions of performance and lag in the remaining trial for each searchlight. This was done  
357 for each subject separately and the model predictions were compared to the experimentally  
358 observed performances and lags (cf. Fig. 5A-D).

359 Expected values of the model parameters were computed according to equation (13). Expected  
360 values were calculated for each cross-validation fold separately and then averaged across the  
361 three cross-validation folds. This yielded the model parameters  $h_{max}, \tau, \lambda, \sigma^2$  for each subject,  
362 shown in Fig. 5E-H.

363

#### 364 *Estimation of the motor noise parameter from the error-variance*

365 If all model assumptions are fulfilled, the motor noise model parameter  $\sigma^2$  will be linearly  
366 related to the error-variance  $\delta^2$  and we should therefore be able to estimate  $\sigma^2$  from  $\delta^2$ . For  
367 each subject we computed  $\sigma^2$  by minimizing the squared error between the model task  
368 performance (eq. 13) and the experimentally determined task performance. A scatter plot of  
369 the resulting  $\sigma^2$  over the error-variance  $\delta^2$  revealed an approximate linear relationship between  
370  $\sigma^2$  and  $\delta^2$ . We then determined the proportionality factor  $\alpha$  by linear-least squares regression  
371 of the model  $\sigma^2 = \alpha\delta^2$  and used it to compute  $\sigma^2$  from  $\delta^2$ . The linear-least squares regression

372 was done for each subject separately, using only the  $\sigma^2$  and  $\delta^2$  values from all other subjects  
373 to avoid overfitting.

374

### 375 **Estimating the influence of model parameters on performance difference between expert** 376 **and naïve groups**

377 To estimate how much a single model parameter causes the experts' gain in performance we  
378 computed the performance of the model for naïve group parameters but with one parameter  
379 (horizon, motor noise, delay or motor penalty) changed to expert group values. We also  
380 performed the opposite procedure, replacing each parameter for each participants of the expert  
381 with those of the naïve group. Using the Bayesian inference approach described in the previous  
382 section, we replaced the full posterior distribution of the affected parameter with the posterior  
383 distribution from the other group. This procedure was carried out for each subject separately  
384 and the posterior of the affected parameter was replaced by the posterior of each subject from  
385 the other group separately. We then computed the posterior of the performance curve and from  
386 that the expected values of the performance by averaging. Hence, we obtained for each  
387 parameter change  $N_e \cdot N_n$  performance curves where  $N_e$  and  $N_n$  are the number of subjects in the  
388 expert and naïve group, respectively. These performance curves were averaged and compared  
389 to the average performances for the expert and naïve groups obtained for the fitted model (see  
390 Results for details).

391

392 Parts of the modelling computations were run on the high-performance computing cluster  
393 NEMO of the University of Freiburg (<http://nemo.uni-freiburg.de>) using Broadwell E5-2630v4  
394 2.2 GHz CPUs.

395 All analysis code is available at <https://github.com/dkobak/path-tracking>.

396

## 397 Results

398

### 399 Learning the Tracking Skill

400 We designed an experiment where subjects had to track a path moving towards them at a  
401 fixed speed (Fig. 1A and Methods). The narrow and wiggly path was moving downwards on a  
402 computer screen while the cursor had a fixed vertical position in the bottom of the screen and  
403 could only be moved left or right. Accuracy, our performance measure, was defined as the  
404 fraction of time that the cursor spent inside the path boundaries. One group of subjects (the  
405 expert group, N=32) trained this task for 30 minutes on each of 5 consecutive days. Another  
406 group (the naïve group, N=30) did not have any training at all. Both groups then performed a  
407 testing block that we describe below.

408

409

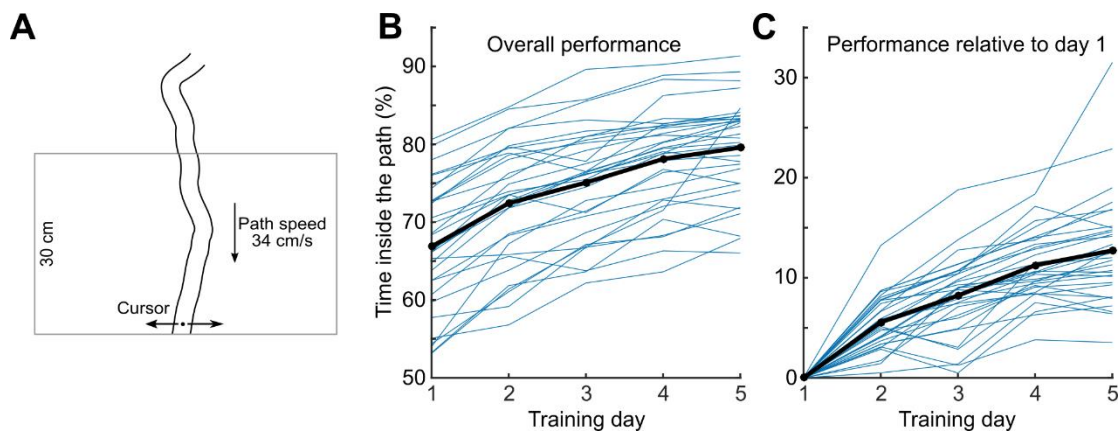

410

411 *Figure 1. Experimental Paradigm. (A) Subjects had to track a curved path that was dropping*  
412 *down from top to bottom of the screen with a fixed speed of 34 cm/sec by moving the cursor*  
413 *horizontally. (B) Expert subjects' performance over the 5 days of training. Bold line shows the*  
414 *group average, thin lines show individual subjects (each point is a mean over 3 trials with the*  
415 *same searchlight length, 100%). (C) Expert subjects' performance over the 5 days of training*  
416 *with the performance on the first day subtracted.*

417

418

419 Over the course of five training days, the experts' accuracy increased from  $66.9 \pm 8.0\%$  to  
420  $79.6 \pm 6.4\%$  (mean  $\pm$  SD across subjects, first and last training day respectively) as shown on Figs  
421 1B-C, with the difference being easily noticeable and statistically significant ( $p = 8 \cdot 10^{-7}$ ,  $z = 4.9$ ,  
422 Wilcoxon signed rank test; Cohen's  $d = 1.8$ ,  $N = 32$ ). As all paths generated during the training  
423 were different, this difference cannot be ascribed to memorizing the path, therefore this  
424 improvement represents the genuine acquisition of the skill of path tracking.

425

### 426 **Searchlight testing**

427 To unravel the mechanisms of skill acquisition we designed testing trials called “searchlight  
428 trials”, during which subjects had to track curved paths as usual but could only see a certain  
429 part of the path (fixed distance  $s$ ) ahead of the cursor. The searchlight length  $s$  varied between  
430 10% and 100% of the whole path length in steps of 10% (the minimal  $s$  was  $\sim 3$ cm) to probe  
431 subjects' planning horizon. Searchlight testing was conducted after 5 days of training for  
432 experts or immediately for novices. During the testing block all subjects completed 30 one-  
433 minute-long trials (three repetitions of each of the 10 values of  $s$ ). The average accuracy at full  
434 searchlight  $s = 100\%$  was  $82.8 \pm 7.5\%$  for the expert group and  $65.7 \pm 8.4\%$  for the naïve group  
435 (mean  $\pm$  SD across subjects), with the difference being highly significant ( $p = 2 \cdot 10^{-9}$ ,  $z = 6.0$ ,  
436 Wilcoxon-Mann-Whitney ranksum test, Cohen's  $d = 2.2$ ,  $N = 62$ ). The performance of the naïve  
437 subjects matched the initial performance of the expert subjects on their first day of training.

438

439 Before we present the rest of the data, let us consider several possible ways in which the  
440 accuracy can depend on the searchlight length (Fig. 2A). For each subject, accuracy should be  
441 a non-decreasing function of searchlight length. The data presented in Poulton (1974) indicate

442 that this function tends to become flat, i.e. subjects reach a performance plateau, after a certain  
443 value of the searchlight length that we will call *planning horizon* (Fig. 2A, top), while we  
444 assume all subjects will be constrained to the similar poor performance at the smallest  
445 searchlight. For the expert group, this function has to reach a higher point at  $s=100\%$ , but it  
446 could do so because the initial rise becomes steeper, for example due to lower motor variability  
447 (Fig. 2A, bottom left), or because the initial rise continues longer, i.e. planning horizon  
448 increases (Fig. 2A, bottom right), or possibly both.

449

450 Fig. 2B shows subjects' accuracy in the searchlights trials as a function of the searchlight length  
451  $s$ . All subjects were strongly handicapped at short searchlights, and at the shortest searchlight  
452 the performance of the two groups was similar with experts being only marginally better  
453 ( $42.5\pm 2.3\%$  for the expert group,  $41.4\pm 1.8\%$  for the naïve group,  $p=0.042$ ,  $z=2.0$  Wilcoxon  
454 ranksum test; Cohen's  $d=0.5$ ,  $N=62$ ).

455

456

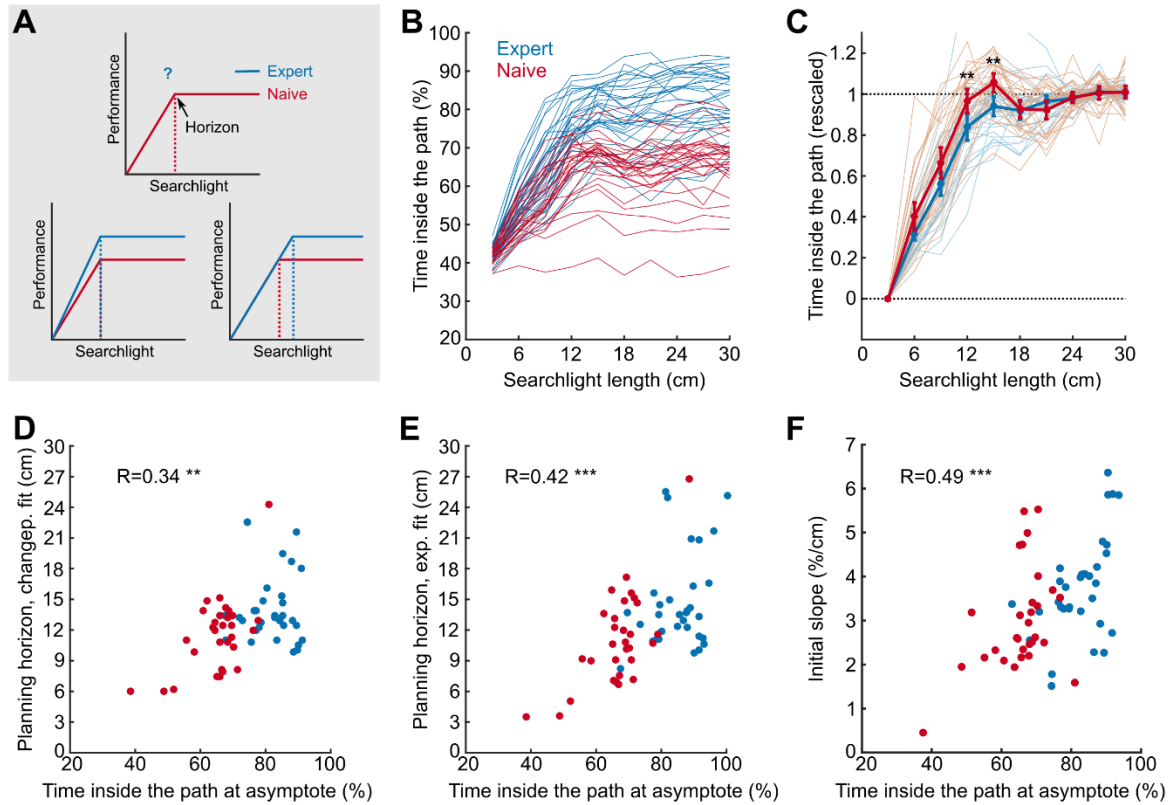

457

458

459 *Figure 2. Searchlight testing. (A) Expert subjects were trained to have a higher performance*  
 460 *at full searchlight length (top). This could be achieved by an increased initial slope (bottom*  
 461 *left) at smaller searchlight length and/or an increased planning horizon as indicated with*  
 462 *dashed vertical lines (bottom right). (B) Mean tracking performance for each searchlight*  
 463 *length for each individual subject, in blue for the expert group and in red for the naïve group.*  
 464 *Faint lines show individual subjects and bold lines show group means. (C) Mean tracking*  
 465 *performance for each searchlight length, rescaled for each subject to start at 0 and end at 1*  
 466 *(see text). Error bars indicate 95% confidence intervals around the means, stars indicate*  
 467 *significance between the groups (\*\*:  $p < 0.01$ , Wilcoxon rank sum test, Bonferroni-Holm*  
 468 *corrected for multiple comparisons). (D-E) Planning horizon for each subject was defined by*  
 469 *fitting a changepoint linear-constant curve (D) or an exponential curve (E) (see text). Both*  
 470 *models yield an asymptote performance for each subject; the changepoint model yields a*

471 *horizon length and the exponential fit yields an “effective” horizon length. The scatter plots*  
472 *show relation between the asymptote performance (as a proxy for subjects' skill) and their*  
473 *planning horizon. Spearman's correlation coefficients are shown on the plot (\*\*:  $p < 0.01$ , \*\*\*:*  
474  *$p < 0.001$ ). Colour of the dot indicates the group. (F) Relationship between the asymptote*  
475 *performance and the initial slope in in the changepoint linear-constant model, colours and*  
476 *values as in D&E (\*\*\*:  $p < 0.001$ ).*

477

478

479 Visual inspection of Fig. 2B suggests that both effects sketched in Fig. 2A contribute to expert  
480 performance. (i) the planning horizon for the expert group was longer than for the naïve group;  
481 and (ii) the expert group had higher accuracies in the initial part of the performance curve,  
482 before the performance plateaus, which could be explained by decreased motor variability.

483

484 To better visualize the change in performance across searchlight lengths, we linearly rescaled  
485 each subject's performance curve, first by subtracting the mean performance at  $s=10\%$  and then  
486 by dividing by the asymptote performance (computed as the mean performance across  $s=80-$   
487  $100\%$ ). The resulting curves all start at 0 and end at 1 (Fig. 2C). We observed a significant  
488 difference between the groups at  $s=40\%$  &  $50\%$  ( $p=0.005$  and  $p=0.004$  respectively, Wilcoxon  
489 ranksum test,  $p$ -values adjusted for testing 6 searchlight lengths between 20% and 70% with  
490 Holm-Bonferroni procedure,  $N=62$ ), indicating that while naïve subjects had reached their  
491 plateau by then, the expert subjects kept increasing their performance. For this analysis we  
492 removed two naïve subjects with essentially flat searchlight curves (Fig. 1B), as rescaling those  
493 did not lead to meaningful results.

494



495 To investigate individual differences in tracking skill, we estimated the planning horizons of  
496 individual subjects (Fig. 2D). For this we fit each subject's performance ( $y$ ) with a changepoint  
497 linear-constant curve (see Methods), where the location of the changepoint defines the horizon  
498 length. We found that the novice group had an average horizon length of  $11.5 \pm 3.6$  cm  
499 (mean  $\pm$  SD; median: 12.0 cm) and the expert group a horizon length of  $14.2 \pm 3.5$  cm (median:  
500 13.2 cm), with statistically significant difference ( $p=0.007$ ,  $z=2.7$ , Wilcoxon ranksum test;  
501 Cohen's  $d=0.8$ ,  $N=62$ ). We also found a positive correlation between the horizon length and  
502 the asymptotic performance ( $R=0.34$ ,  $p=0.006$ , Spearman correlation,  $N=62$ ).

503

504 In addition to the changepoint model, we also quantified the “effective” planning horizon using  
505 a single exponential to fit the individual subjects' performance data (see Methods). This  
506 analysis confirmed our results (Fig. 2E). We again observed a significant difference in the  
507 effective horizon length between the two groups ( $14.76 \pm 4.6$  cm vs.  $11.04 \pm 4.7$  cm, means  $\pm$  SD  
508 for both groups, medians: 13.6 cm and 10.7 cm,  $p=0.002$ ,  $z=3.0$ , Wilcoxon ranksum test;  
509 Cohen's  $d=0.8$ ,  $N=62$ ). Again, we found a positive correlation between the asymptote  
510 performance and the effective horizon length ( $R=0.43$ ,  $p=0.0008$ , Spearman correlation,  
511  $N=62$ ).

512

513 Not only was planning horizon positively correlated with tracking skill (the asymptote  
514 accuracy), but also the initial slope of the changepoint model ( $3.7 \pm 1.2$  %/cm vs.  $3.0 \pm 1.2$  %/cm,  
515 mean  $\pm$  SD; medians: 3.6 %/cm vs. 2.6 %/cm). Fig. 2F shows that there was a positive  
516 correlation between the initial slope and asymptote accuracy ( $R=0.49$ ,  $p=6.10^{-5}$  Spearman  
517 correlation,  $N=62$ ) as well as a clear difference in the initial slope between the groups ( $p=0.008$ ,  
518  $z=2.6$ , Wilcoxon ranksum test; Cohen's  $d=0.6$ ,  $N=62$ ).

519

520 We therefore conclude that the difference between expert and naïve performances is a  
521 combination of both possibilities presented in Fig. 2A. Using the expert and naïve median  
522 estimates of the intercept, the slope, and the horizon in the changepoint model, we can estimate  
523 the contribution of both effects on the asymptote performance. The changepoint model  
524 asymptote performance for the naïve group was 63.5%, compared to 78.7% for the expert  
525 group. The model performance of the expert group at the naïve horizon was 74.2%. Hence,  
526 approximately 71% of the expert performance gain of 15.2%, was due to the increase in the  
527 initial slope (possibly due to lower motor variability), and the remaining 29% can be attributed  
528 to the increase in planning horizon. The identical procedure with mean model parameter  
529 estimates instead of median estimates, yields 44% attributable to motor acuity and 56%  
530 attributable to planning horizon. We conclude that between a third and a half of the expert  
531 performance gain is attributable to their increase in planning horizon.

532

### 533 **Trajectory analysis**

534 Naïve subjects performed worse than the expert subjects at long searchlights but all subjects  
535 performed almost equally badly at short searchlights. What kinematic features can these  
536 differences be attributed to?

537

538 Clearly, at short searchlights, performance has to be reactive. To measure how quickly changes  
539 in the path were reflected in the motor commands, we computed the time lag between cursor  
540 trajectory and path midline (the lag maximizing cross-correlation between them). As Fig. 3A  
541 shows the lag was ~200 ms at  $s=10\%$  for all subjects and dropped to ~0 ms at  $s=50\%$  for the  
542 expert group. While many naïve subjects also decreased their lags to zero, 10 out of 30 never  
543 achieved the 0 ms lag. The five naïve subjects showing the largest lags at large searchlights

544 were also those with the worst performance (Fig. 3B). Therefore, there was a strong negative  
545 correlation between the asymptote lag (mean across  $s=80-100\%$ ) and the asymptote  
546 performance (mean across  $s=80-100\%$ ) of  $R=-0.58$  (Fig. 3B,  $p=8 \cdot 10^{-7}$ , Spearman correlation,  
547  $N=62$ ).  
548

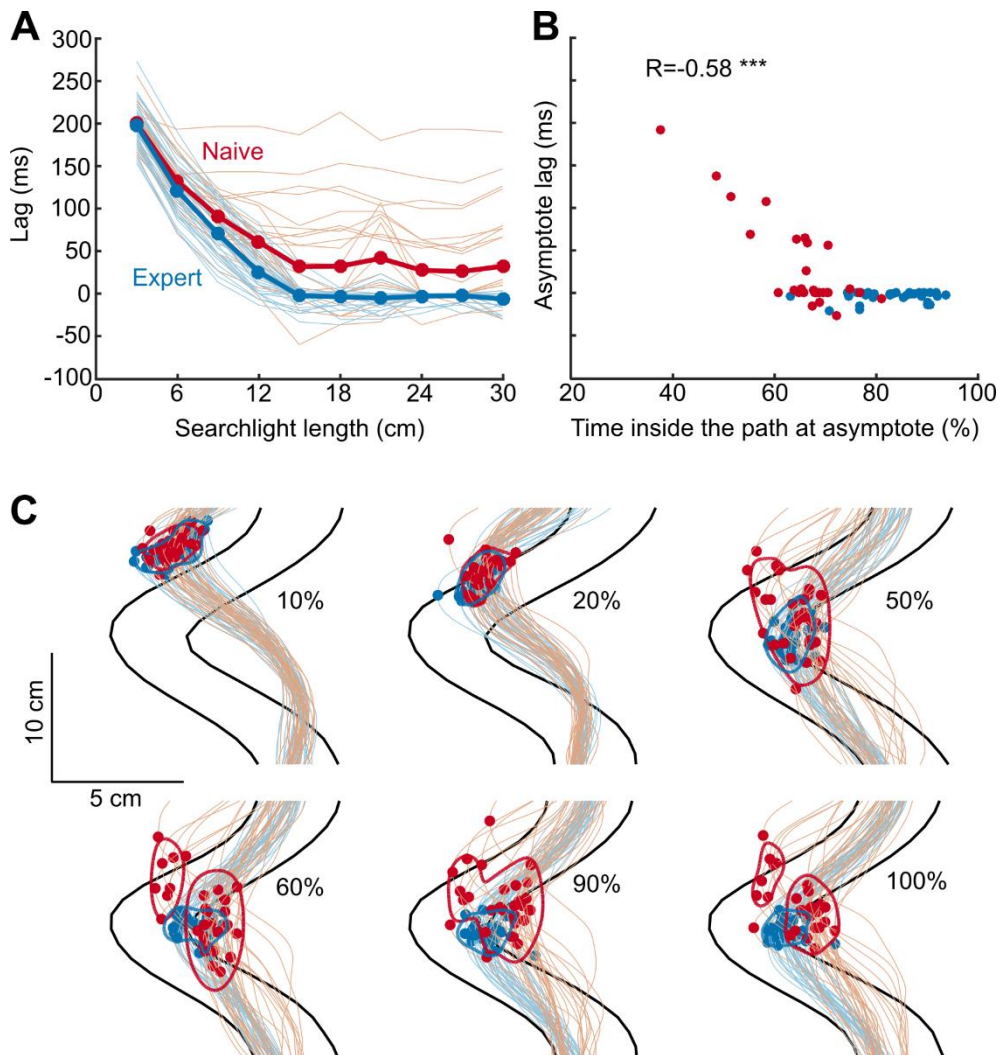

549  
550

551 *Figure 3. Analysis of trajectories. (A) Mean time lag between cursor trajectory and path*  
552 *midline, for each searchlight length for each individual subject (faint lines) and mean of per-*  
553 *subject values (bold lines), in blue for the expert group and in red for the naïve group. (B)*  
554 *Asymptote lag and asymptote performance across subjects. Correlation coefficient is shown on*

555 *the plot (\*\* $p < 0.001$ ). Colour of the dot indicates the group. (C) Average per-subject*  
556 *trajectories in sharp bends (leftward bends were flipped to align them with the rightward*  
557 *bends). Each trajectory is averaged across approximately 40 bends (the number of bends*  
558 *varied across searchlight lengths). Colour of the lines indicates the group. Black lines show*  
559 *average path contour. Dots show turning points of the trajectory. Contour lines show the kernel*  
560 *density estimate 75% coverage areas. Subplots correspond to searchlight lengths  $s=10\%$ ,  $20\%$ ,*  
561  *$50\%$ ,  $60\%$ ,  $90\%$  and  $100\%$ .*

562

563 Next, for each testing path we found all segments exhibiting sharp leftward or rightward bends  
564 (see materials and methods, our inclusion criteria yielded  $13 \pm 5$  segments per path, mean  $\pm$  SD).  
565 For each searchlight length  $s$  and for each subject, we computed the average cursor trajectory  
566 over all segments ( $N=38 \pm 8$  segments per searchlight) after aligning all segments on the bend  
567 position (Fig. 3C, leftward bends were flipped to align them with the rightward bends). At  
568  $s=10\%$  all subjects from both groups follow very similar lagged trajectories, resulting in low  
569 accuracy. As searchlight increases, expert subjects reach zero lag and choose more and more  
570 similar trajectories, whereas naïve subjects demonstrate a wide variety of trajectories with some  
571 of them failing to reach zero lag and others failing to keep the average trajectory inside the path  
572 boundaries. To visualize this, we plotted the kernel density estimate 75% coverage contour of  
573 inflection points for each group. As the searchlight increases, the groups become less  
574 overlapping and the naïve group appears to form a bimodal distribution (Fig. 3C).

575

576 In summary, at very short searchlights all subjects performed poorly because in this reactive  
577 regime their trajectories lagged behind the path. At longer searchlights the expert subjects were  
578 able to plan their movement to accommodate the bends (the longer the searchlight the better),

579 but naïve subjects failed to do so in various respects: either still lagging behind or not being  
580 able to plan a good trajectory.

581

### 582 **Receding horizon model analysis**

583 Next, we modelled subjects' behaviour by receding horizon control (RHC) to illustrate that  
584 such an approach is able to capture some crucial features of the behavioural data. In RHC a  
585 sequence of motor commands is computed to minimize the expected cost over a future time  
586 interval of finite length, i.e. the horizon. After the first motor command is applied, the  
587 optimization procedure is repeated using a time interval shifted one time step ahead. See  
588 Methods section for a more detailed and formal description of RHC. As cost function, we used  
589 the weighted sum of a measure of inaccuracy (i.e. probability of being outside the path) and  
590 the magnitude of the motor cost (see Methods for details). Cost function with a similar trade-  
591 off between movement accuracy and motor command magnitude have been used previously to  
592 describe human motor behaviour in different tasks (Braun et al. 2009; Diedrichsen 2007;  
593 Todorov and Jordan 2002). The model has four different parameters: horizon ( $h$ ), motor noise  
594 ( $\sigma^2$ ), motor delay ( $\tau$ ) and motor command penalty weight ( $\lambda$ ).

595 We ran the model on the experimental paths to obtain simulated movement trajectories from  
596 which task performance and lag could be computed in the same way as for the experimental  
597 trajectories (Fig. 2 and 3). Our simulations revealed that both, a larger model horizon as well  
598 as a smaller motor noise parameter increased the task performance and decreased the lag (Fig.  
599 4). Hence, the experimentally observed higher performance and smaller lag of expert subjects  
600 compared to naïve (Fig. 2B and 3A) could be explained either by an increased model horizon  
601 or by reduced motor noise in the model. However, the searchlight length at which the task  
602 performance of the model reached a plateau increased with model horizon and did not change  
603 or even decreased with a smaller motor noise parameter (Fig. 4A, C). Experimentally, on the

604 other hand, we observed that subjects with a higher task performance reached their  
605 performance plateau at higher searchlights (Fig. 2D, E). This correlation between performance  
606 and plateau onset, that was observed experimentally, cannot be explained by the variation of  
607 the motor noise parameter across subjects, but is only consistent with an increase of the model  
608 planning horizon for subjects with higher performance.

609

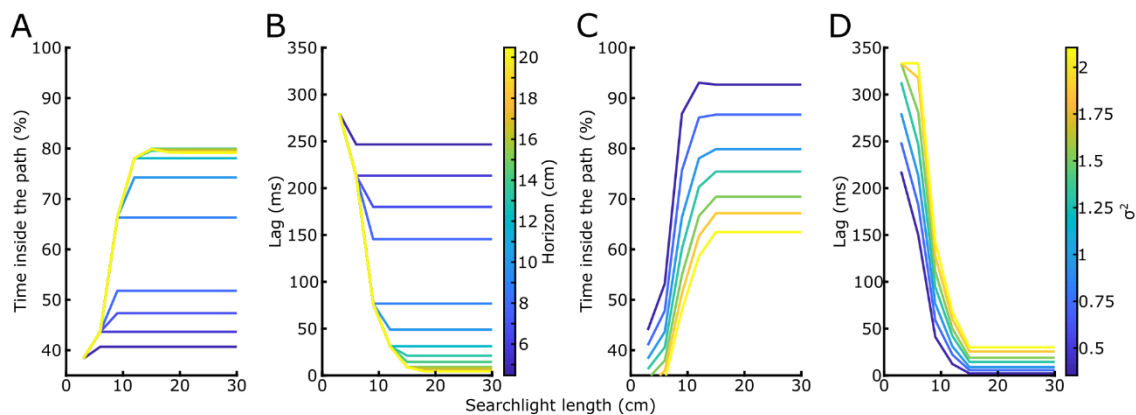

610

611 *Figure 4: Task performance and lag as a function of searchlight length for model simulations*  
612 *with different horizons (A,B) or different amounts of motor noise (C,D). A motor noise of  $\sigma^2=1$*   
613 *was used for (A,B) and a horizon of  $h=15\text{cm}$  for (C,D). The motor delay and motor command*  
614 *penalty weight were fixed at  $\tau=200\text{ms}$  and  $\lambda=0.5$  in all simulations.*

615

616 Next, we used Bayesian inference to estimate the model parameters from the experimentally  
617 observed movement trajectories (see Methods for details). Based on inferred distributions of  
618 parameter values, we then predicted task performance and lag for each subject. To avoid over-  
619 fitting cross-validation was used, i.e. fitting and prediction was done on different trials. Model  
620 task performance and lag resembled the experimentally observed task performance and lag  
621 with regard to their change across searchlights as well as with regard to the difference between  
622 naïve and the expert subjects (Fig. 5A,B). On a single subject and trial level there was a high

623 correlation between model and experimental task performance (Fig. 5C, Spearman correlation  
624  $r=0.9$ ,  $R^2=0.84$ ) and lags (Fig. 5D, Spearman correlation  $r=0.87$ ,  $R^2=0.88$ ).

625

626 We compared the estimated model parameters between expert and naïve subjects. The fitted  
627 model horizon was higher for the expert group than for the naïve group (Fig. 5E, Wilcoxon  
628 ranksum test:  $z=4.84$ ,  $p=1\cdot 10^{-6}$ ,  $N=62$ ) and was correlated with the horizon obtained from the  
629 change point analysis (Spearman correlation,  $r=0.48$ ,  $p=7\cdot 10^{-5}$ ,  $N=62$ ) and the exponential fits  
630 (Spearman correlation,  $r=0.43$ ,  $p=6\cdot 10^{-4}$ ,  $N=62$ ). One caveat here is that there was large  
631 uncertainty in the estimates of model horizon for most subjects, and the exact values shown in  
632 Fig. 5E might be systematically biased due to some model misspecification (in particular, note  
633 that the values in Fig. 5E are all larger than the estimates in Fig. 2D,E). That said, the RHC  
634 model estimates qualitatively agree with our earlier estimates that the expert horizons were  
635 larger than the naïve horizons.

636

637 The fitted motor noise was significantly lower for the expert than for the naïve group (Fig. 5F;  
638 Wilcoxon ranksum test:  $z=4.66$ ,  $p=3\cdot 10^{-6}$ ,  $N=62$ ) while the delay and the penalty parameters  
639 were not different (Fig. 5G,H; delay: Wilcoxon rank sum test,  $z=1.50$ ,  $p=0.13$ ; penalty:  
640 Wilcoxon rank sum test,  $z=0.528$ ,  $p=0.60$ ,  $N=62$ ). In the model, lower motor noise lead to  
641 steeper initial accuracy slope (Fig. 4C). The expert group having lower estimated motor noise  
642 hence agrees well with our observation that experts had steeper initial accuracy slope (Fig. 2F).

643



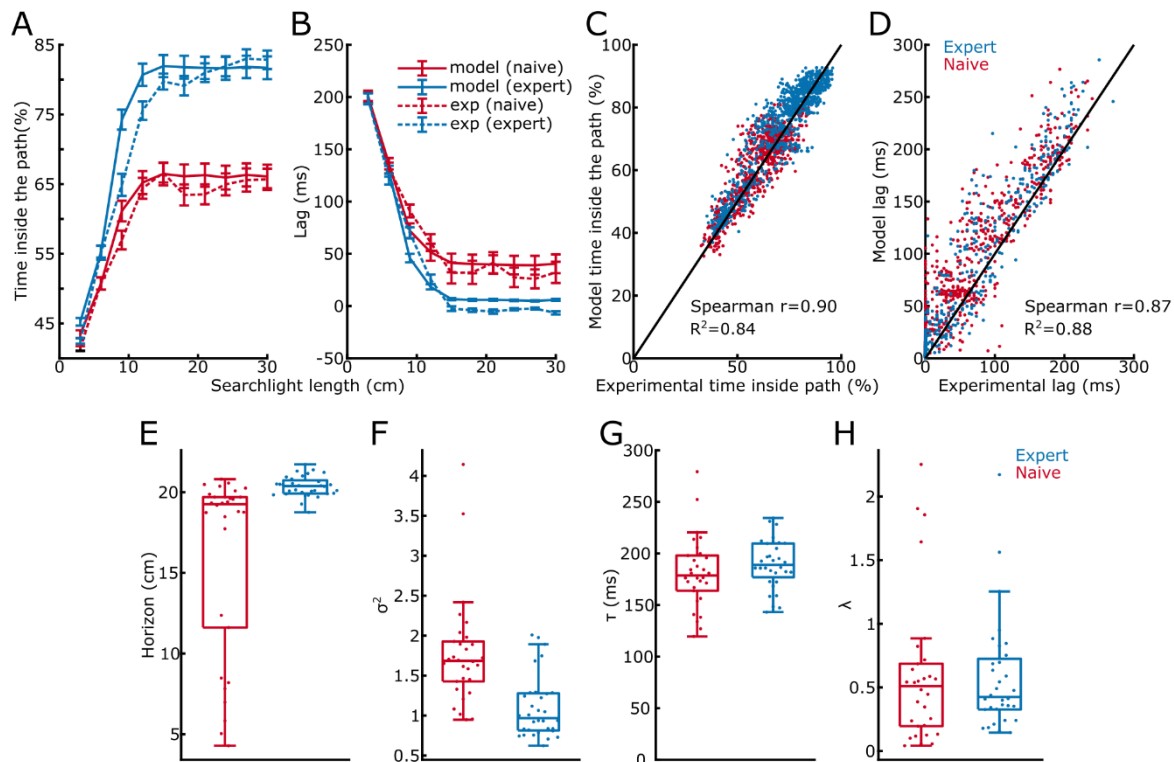

644

645 *Figure 5: Comparison between the receding horizon model and subjects' behaviour. A,B: Task*  
 646 *performance and lag as a function of the searchlight for expert and naive subjects for the*  
 647 *experiments and model simulations. C,D: Scatter plot of model and experimental task*  
 648 *performance and lag for each trial of each subject. E-H: Model parameters for the subjects*  
 649 *from the naive and the expert group. Each dot depicts one subject, boxplots show medians as*  
 650 *well as first and third quartiles.*

651

652 Using the model fits obtained above, we estimated how much of the experts' gain in asymptote  
 653 performance was due to increased horizon vs. decreased noise. To do this, we simulate the  
 654 model with naive group parameters but expert group horizons (see Methods). This brings the  
 655 performance almost half-way to the expert performance (for large searchlights the performance  
 656 levelled off at 72% instead of 82% with lower horizon, compared to 66% for the naive  
 657 subjects). We observe roughly the same increase (to 75%) when we simulate the model with  
 658 naive group parameters but expert group noise levels. Similarly, when we use expert group



659 parameters but naïve group horizons or noise levels, the performance drops approximately half-  
660 way to the naïve accuracy (74% for naïve horizon, 71% for naïve motor noise). In contrast, the  
661 delay and the motor penalty parameters had less influence on the asymptote performance (63%  
662 and 64% for naïve group parameters with expert delay or motor penalty; 80% for expert group  
663 parameters with naïve delay or motor penalty). From this we conclude that the increase in the  
664 experts' performance was caused by equal measures through an increase in planning horizon  
665 and the decrease in motor noise. This is in a good qualitative agreement with the conclusions  
666 we presented earlier based on the linear changepoint fits.

667

668 **Discussion**

669

670 We used a paradigm that allowed us to study skill development when humans had to track an  
671 unpredictable spatial path. The skill requires fast reactions to new upcoming bends in the road,  
672 but also a substantial “planning ahead” component – i.e. the anticipation and preplanning of  
673 movements that have to be made in the near future. We used the accuracy, i.e. the fraction of  
674 time the cursor was inside the path boundaries, as the measure of performance. We observed a  
675 substantial improvement in accuracy after 5 days of training (Fig. 1B,C). The paths were  
676 different on every trial, so the improvement in performance cannot be attributed to a memory  
677 for the sequence.

678

679 What changes in the motor system occur through learning that allowed skilled subjects to  
680 perform better? One component of this improvement has been previously called “motor acuity”  
681 (Shmuelof et al. 2012, 2014) and corresponds to the subjects’ ability to execute motor  
682 commands more accurately, i.e. due to the lower motor variability. We hypothesized that an  
683 additional component is an increased ability to take into account approaching path bends and  
684 to prepare for an upcoming movement segment. We directly estimated both effects by using a  
685 searchlight testing where only a part of the approaching curve was visible. In agreement with  
686 our hypothesis, we found that subjects with a higher tracking skill demonstrated larger planning  
687 horizons: on average ~14cm for the expert group vs. ~11cm for the naïve group, corresponding  
688 to the time horizons of ~0.4s and ~0.3s respectively. Our results suggest that the increase in  
689 planning horizon is not an epiphenomenon but is causally related to the performance increase,  
690 as expert subjects showed worse performance when the searchlight was reduced below their  
691 planning horizon (Figure 2C). We estimated that in our experiments between a third and a half  
692 of the increased performance after practice can be attributed to an increased planning horizon

693 while the rest can be accounted for by a reduction in the motor variability which may be  
694 interpreted as higher motor acuity.

695

696 The expert group showed higher initial slope of the searchlight-accuracy curve. We interpreted  
697 this as an indirect evidence for lower motor variability, even though other explanations for  
698 higher slope are in principle also possible. Our assumption was that as long as the searchlight  
699 lengths does not exceed a subject's horizon, all subjects (expert and naive) are able to use  
700 information about the whole visible path chunk. The results of the RHC fits showed a clear  
701 difference in motor noise between the groups, in agreement with our interpretation that the  
702 expert group had lower motor variability.

703

704 Note that “planning”/“preparing” the movement can be interpreted differently depending on  
705 the computational approach. In the framework of optimal control (Todorov and Jordan 2002),  
706 subjects do not plan the actual trajectory to be followed, but instead use an optimal time-  
707 dependent feedback policy and then execute the movement according to this policy. The  
708 observed increase in planning horizon can be interpreted in the framework of model predictive  
709 control, also known as receding horizon control, RHC (Kwon and Han 2005). In RHC, the  
710 optimal control policy is computed for a finite and limited planning horizon, which may not  
711 capture the whole duration of the trial. This policy is then applied for the next control step,  
712 which is typically very short, and the planning horizon is then shifted one step forward to  
713 compute a new policy. Hence, RHC does not use a pre-computed policy, optimal for an infinite  
714 horizon, but a policy which is only optimal for the current planning horizon. Increasing the  
715 length of the planning horizon is therefore likely to increase the accuracy of the control policy.  
716 In our experiments this would allow for a larger fraction of time spent within the path  
717 boundaries. We designed a simple RHC model to test directly which components in the model

718 would have to change through training to quantitatively explain the subject's behaviour. The  
719 dynamics of movement and the cost function were modelled in line with previous studies that  
720 used optimal control to describe human behaviour in various motor control and learning tasks  
721 (Braun et al. 2009; Diedrichsen 2007; Todorov and Jordan 2002). We fitted the RHC model to  
722 the behaviour of each subject and found that it was able to fit the data very accurately (Fig. 5).  
723 The experimentally observed differences between expert and naïve subjects were reflected in  
724 the model fits by higher planning horizons and lower motor noise parameters in the expert  
725 group. Our findings, thus, demonstrate that subjects' behaviour can be understood in the  
726 context of RHC, and longer planning horizons of the expert group indicate that subjects learn  
727 how to take advantage of future path information to improve motor performance.

728

729

730 Despite a clear difference in the distribution of planning horizons between the naive and the  
731 expert groups (Fig. 2D), there was a substantial overlap: the planning horizon of many naive  
732 and expert subjects were similar. While this might simply reflect a moderate effect size  
733 combined with inter-subject variability and measurement noise, it also remains a possibility  
734 that the difference between groups was largely caused by those naive subjects with very low  
735 horizons and expert subjects with very high horizons.

736

### 737 **Related work**

738 Ideas like the RHC were put forward in a recent study (Ramkumar et al. 2016) that suggested  
739 that movements are broken up in 'chunks' in order to deal with the computational complexity  
740 of planning over long horizons. That study suggests that monkeys increase the length of their  
741 movement chunks during extended motor learning over the course of many days which may  
742 be explained by monkeys increasing their planning horizon with learning. At the same time,

743 the efficiency of movement control within the chunks improved with learning which may also  
744 be the result of a longer horizon. Despite these potential consistencies with our approach we  
745 note that in their model Ramkumar et al. (2016) assumed that ‘chunks’ are separated by halting  
746 points (i.e. points of zero speed) and movements within ‘chunks’ are optimized independently  
747 from each other. Our RHC model does not have independent movement elements but  
748 movements are optimized continuously.

749

750 Even though our study, to the best of our knowledge, is the first to directly investigate the  
751 evolution of the planning horizon during continuous path tracking, an increase in the planning  
752 horizon after learning has been recently demonstrated when learning sequences of finger  
753 movements (Ariani et al. 2020). Similar path tracking tasks have been used before (Poulton  
754 1974). Using a track that was drawn on a rotating paper roll, these early studies found that the  
755 accuracy of the tracking increased with practice and with increasing searchlight length (which  
756 was modified by physically occluding part of the paper roll, (Poulton 1974), p 187). These  
757 studies, however, did not investigate the effect of learning on the planning horizon.

758

759 More recent studies used path tracking tasks where the goal was to move as fast as possible  
760 while maintaining the accuracy (instead of moving at a fixed speed). In all of these studies the  
761 identical path was repeatedly presented. In one study subjects had to track a fixed maze without  
762 visual feedback and learnt to do it faster as the experiment progressed (Petersen et al. 1998);  
763 there the subjects had to once “discover” and then remember the correct way through the maze.  
764 In another series of experiments, Shmuelof et al. asked subjects to track two fixed semi-circular  
765 paths. Subjects became faster and more accurate over the course of several days (Shmuelof et  
766 al. 2012), but this increase in the speed and accuracy did not generalize to untrained paths  
767 (Shmuelof et al. 2014). In contrast to these previous path tracking studies, we used randomly

768 generated paths throughout the experiment. By investigating the generalization of the path  
769 tracking skill to novel paths we could reveal an increasing planning horizon with learning.

770

771 **Conclusion**

772 In conclusion, we have established that people are able to learn the skill of path tracking and  
773 improve their skill over 5 days of training. This increase in motor skill is associated with the  
774 increased motor acuity and increased planning horizon. The dynamics of preplanning can be  
775 well described by a receding horizon control model.

776 **Acknowledgements**

777 The study was in parts supported by the German Federal Ministry of Education and Research  
778 (BMBF) grant 01GQ0830 to BFNT Freiburg-Tübingen. The authors acknowledge support by  
779 the state of Baden-Württemberg through bwHPC and the German Research Foundation (DFG)  
780 through grant no INST 39/963-1 FUGG. The authors also thank the ‘Struktur- und  
781 Innovationsfonds Baden-Württemberg (SI-BW)’ of the state of Baden-Württemberg for  
782 funding.

783

784 **Author Contribution**

785 Conceptualization, LB. DK. and CM; Methodology, LB. DK. JD and CM; Formal Analysis,  
786 LB. DK and CM; Writing – Original Draft, LB. DK and CM; Writing – Review and Editing,  
787 LB, DK, JD and CM.

788

## 789 References

- 790 **Ariani G, Kordjazi N, Diedrichsen J.** The planning horizon for movement sequences.  
791 *bioRxiv* 2020.07.15.204529, 2020.
- 792 **Bashford L, Kobak D, Mehring C.** Motor skill learning by increasing the movement  
793 planning horizon [Online]. *ArXiv14106049 Q-Bio* ,  
794 2014<http://arxiv.org/abs/1410.6049> [15 Dec. 2015].
- 795 **Botev ZI, Grotowski JF, Kroese DP.** Kernel density estimation via diffusion. *Ann Stat* 38:  
796 2916–2957, 2010.
- 797 **Brainard DH.** The Psychophysics Toolbox. *Spat Vis* 10: 433–436, 1997.
- 798 **Braun DA, Aertsen A, Wolpert DM, Mehring C.** Learning Optimal Adaptation Strategies  
799 in Unpredictable Motor Tasks. *J Neurosci* 29: 6472–6478, 2009.
- 800 **Diedrichsen J.** Optimal task-dependent changes of bimanual feedback control and  
801 adaptation. *Curr Biol CB* 17: 1675–1679, 2007.
- 802 **Diedrichsen J, Kornysheva K.** Motor skill learning between selection and execution. *Trends*  
803 *Cogn Sci* 19: 227–233, 2015.
- 804 **Diedrichsen J, Shadmehr R, Ivry RB.** The coordination of movement: optimal feedback  
805 control and beyond. *Trends Cogn Sci* 14: 31–39, 2010.
- 806 **Dimitriou M, Wolpert DM, Franklin DW.** The Temporal Evolution of Feedback Gains  
807 Rapidly Update to Task Demands. *J Neurosci* 33: 10898–10909, 2013.
- 808 **Gelman A, Carlin JB, Stern HS, Rubin DB.** *Bayesian Data Analysis, Second Edition.* 2nd  
809 edition. Boca Raton, Fla: Chapman and Hall/CRC, 2003.
- 810 **Karni A, Meyer G, Jezzard P, Adams MM, Turner R, Ungerleider LG.** Functional MRI  
811 evidence for adult motor cortex plasticity during motor skill learning. *Nature* 377:  
812 155–8, 1995.
- 813 **Karni A, Meyer G, Rey-Hipolito C, Jezzard P, Adams M, Turner R, Ungerleider L.** The  
814 acquisition of skilled motor performance : Fast and slow experience-driven changes in  
815 primary motor cortex. *Proc Natl Acad Sci U S A* 95: 861–868, 1998.
- 816 **Kwon WH, Han SH.** Receding Horizon Control: Model Predictive Control for State Models  
817 [Online]. Springer-Verlag.[//www.springer.com/la/book/9781846280245](http://www.springer.com/la/book/9781846280245) [21 Mar.  
818 2018].
- 819 **Momennejad I, Russek EM, Cheong JH, Botvinick MM, Daw ND, Gershman SJ.** The  
820 successor representation in human reinforcement learning. *Nat Hum Behav* 1: 680–  
821 692, 2017.
- 822 **Petersen SE, Mier H van, Fiez JA, Raichle ME.** The effects of practice on the functional  
823 anatomy of task performance. *Proc Natl Acad Sci* 95: 853–860, 1998.
- 824 **Poulton EC.** *Tracking Skill and Manual Control.* Academic Press, Incorporated, New York,  
825 N.Y., 1974.
- 826 **Ramkumar P, Acuna DE, Berniker M, Grafton ST, Turner RS, Kording KP.** Chunking  
827 as the result of an efficiency computation trade-off. *Nat Commun* 7: 12176, 2016.
- 828 **Shadmehr R, Smith MA, Krakauer JW.** Error Correction, Sensory Prediction, and  
829 Adaptation in Motor Control. *Annu Rev Neurosci* 33: 89–108, 2010.
- 830 **Shmuelof L, Krakauer JW, Mazzoni P.** How is a motor skill learned? Change and  
831 invariance at the levels of task success and trajectory control. *J Neurophysiol* 578–  
832 594, 2012.
- 833 **Shmuelof L, Yang J, Caffo B, Mazzoni P, Krakauer JW.** The neural correlates of learned  
834 motor acuity. *J Neurophysiol* 112: 971–980, 2014.
- 835 **Todorov E, Jordan MI.** Optimal feedback control as a theory of motor coordination. *Nat*  
836 *Neurosci* 5: 1226–1235, 2002.



- 837 **Walker MP, Brakefield T, Morgan A, Hobson JA, Stickgold R.** Practice with Sleep  
838 Makes Perfect : Sleep-Dependent Motor Skill Learning. *Neuron* 35: 205–211, 2002.
- 839 **Waters-Metenier S, Husain M, Wiestler T, Diedrichsen J.** Bihemispheric Transcranial  
840 Direct Current Stimulation Enhances Effector-Independent Representations of Motor  
841 Synergy and Sequence Learning. *J Neurosci* 34: 1037–1050, 2014.
- 842 **Wolpert DM, Diedrichsen J, Flanagan JR.** Principles of sensorimotor learning. *Nat Rev*  
843 *Neurosci* 12: 739–51, 2011.
- 844 **Wong AL, Lindquist MA, Haith AM, Krakauer JW.** Explicit knowledge enhances motor  
845 vigor and performance: motivation versus practice in sequence tasks. *J Neurophysiol*  
846 114: 219–232, 2015.
- 847
- 848
